# Supplementary material for: Facile one-pot synthesis of Ge/TiO2 nanocomposite structures with improved electrochemical performance
Source: Royal Society of Chemistry journal article supplement (doi:10.1039/c9nr04315b), 2019-01-01
Supplement: c9nr04315b1.pdf [file c9nr04315b1.pdf]

## [Supporting Information]

### **Facile one-pot synthesis of Ge/TiO<sub>2</sub> nanocomposite structures with improved electrochemical performance**

Hyeona Kim<sup>a</sup>, Min-Cheol Kim<sup>a</sup>, Sojeong Choi<sup>a</sup>, Sang-Hyun Moon<sup>a</sup>, Yo-Seob Kim<sup>a</sup>, Kyung-  
Won Park<sup>a,\*</sup>

<sup>a</sup> Department of Chemical Engineering, Soongsil University, Seoul 06987, Republic of Korea

\* Corresponding author. Tel: +82-2-820-0613. Fax: +82-2-812-5378.

E-mail address: kwpark@ssu.ac.kr (Prof. K.-W. Park).

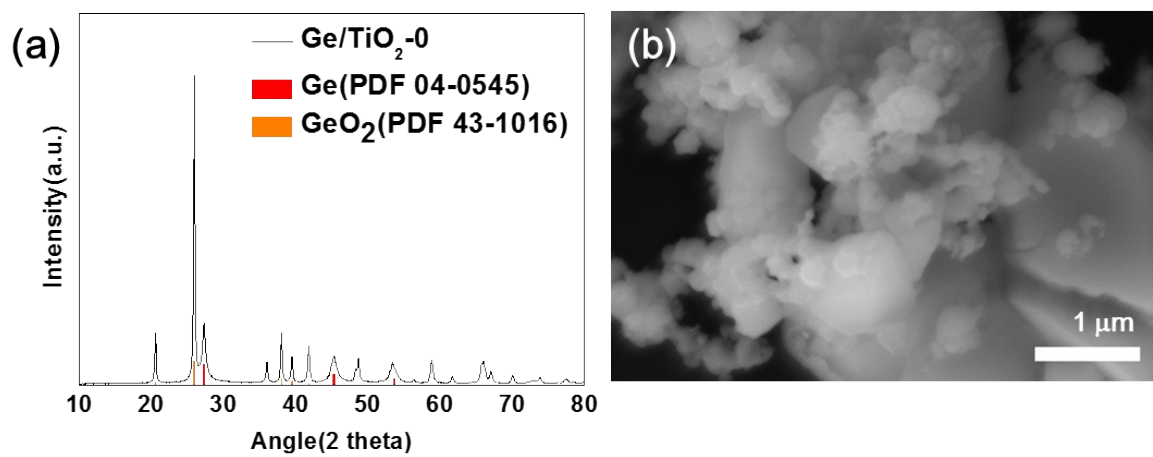

**Fig. S1.** (a) XRD pattern and (b) SEM image of Ge/TiO<sub>2</sub>-0.

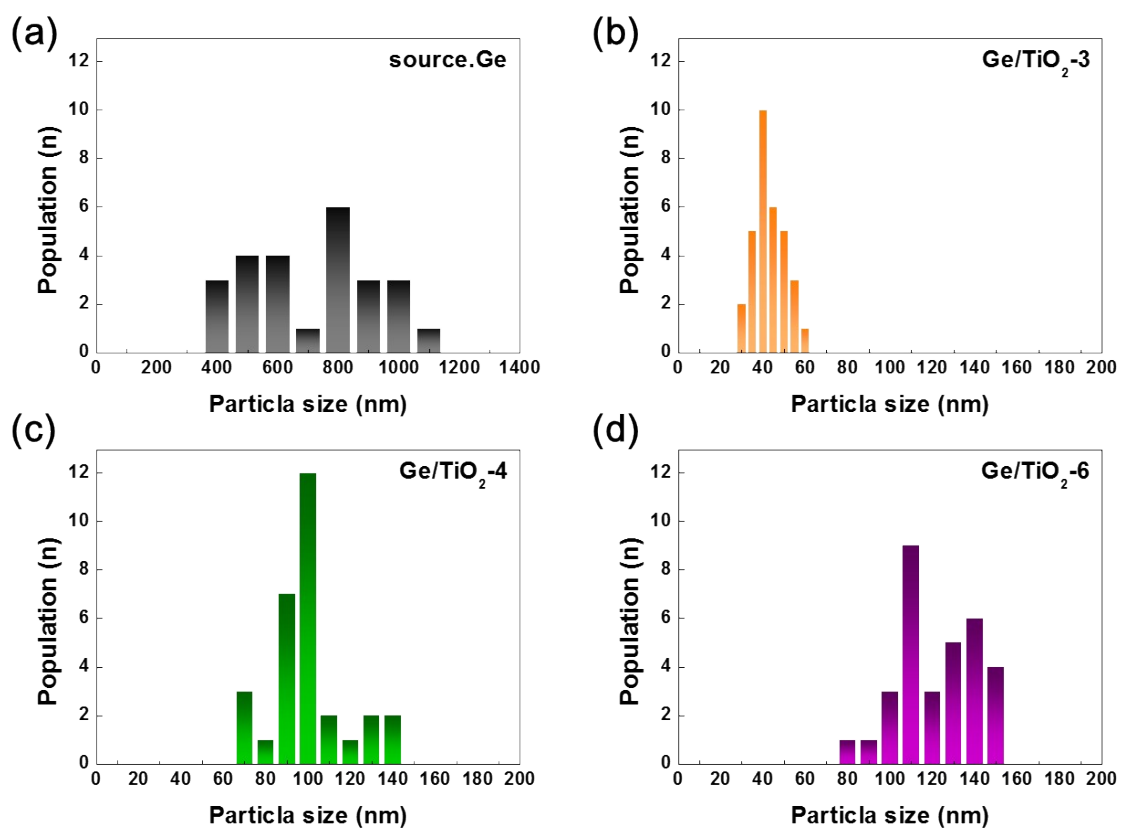

**Fig. S2.** Particle size distributions of (a) Ge source, (b) Ge/TiO<sub>2</sub>-3, (c) Ge/TiO<sub>2</sub>-4, and (d) Ge/TiO<sub>2</sub>-6.

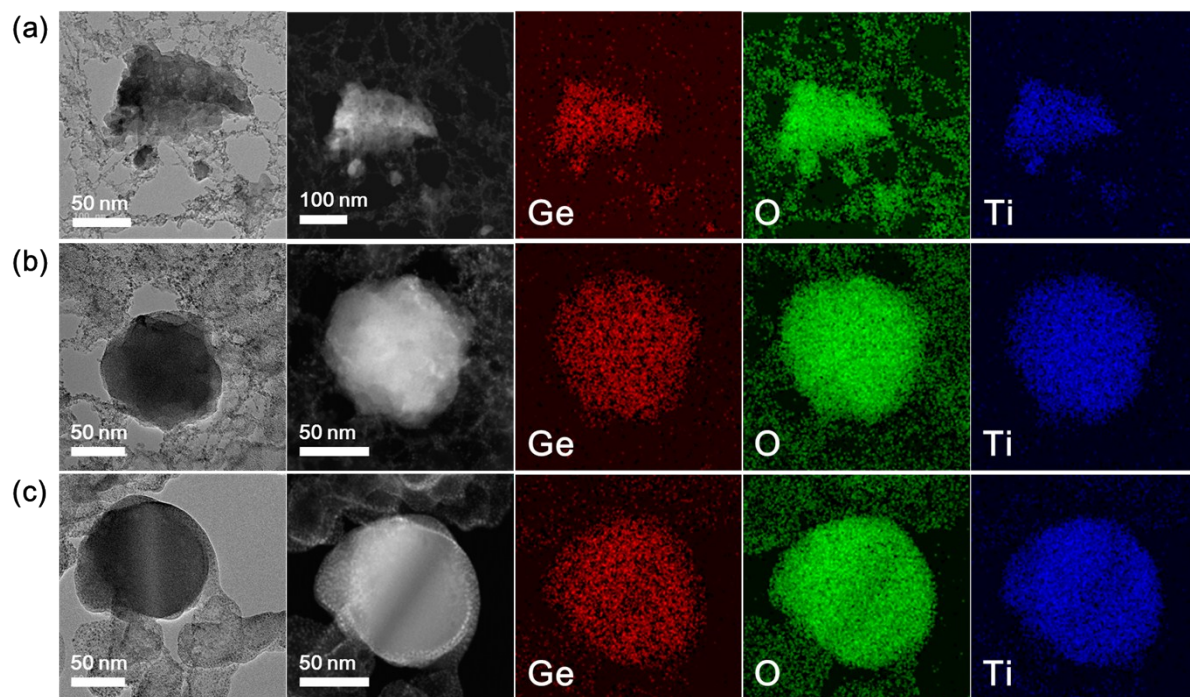

**Fig. S3.** CS-TEM cross-sectional and mapping images of (a) Ge/TiO<sub>2</sub>-3, (b) Ge/TiO<sub>2</sub>-4, and (c) Ge/TiO<sub>2</sub>-6.

**Table S1.** XPS quantification of comm. Ge, Ge/TiO<sub>2</sub>-3, Ge/TiO<sub>2</sub>-4, and Ge/TiO<sub>2</sub>-6

| <b>At. %</b> | <b>comm.Ge</b> | <b>Ge@TiO<sub>2</sub>-3</b> | <b>Ge@TiO<sub>2</sub>-4</b> | <b>Ge@TiO<sub>2</sub>-6</b> |
|--------------|----------------|-----------------------------|-----------------------------|-----------------------------|
| <b>Ge 3d</b> | <b>63</b>      | <b>21</b>                   | <b>13</b>                   | <b>11</b>                   |
| <b>Ti 2p</b> | <b>0</b>       | <b>15</b>                   | <b>20</b>                   | <b>21</b>                   |

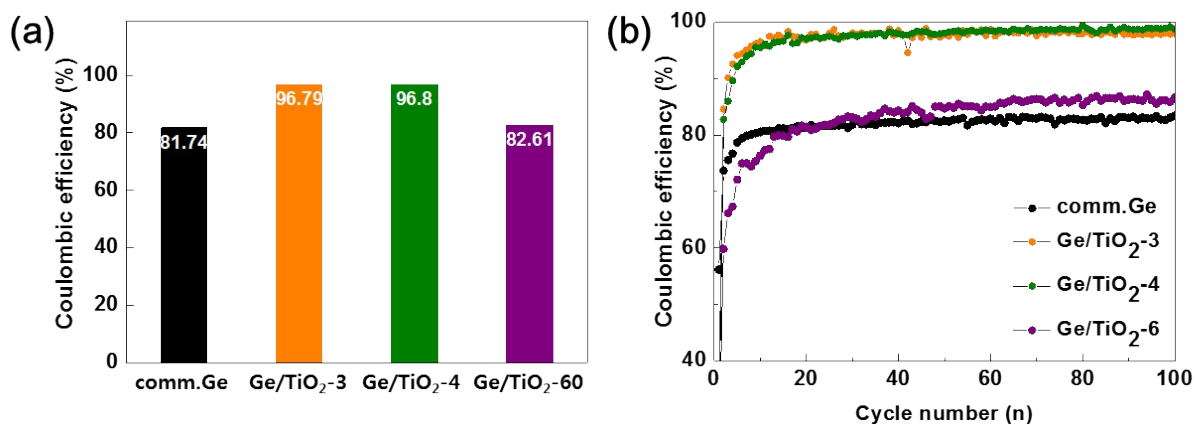

**Fig. S4.** (a) Coulombic efficiencies of the samples measured at a current density of  $100 \text{ mA g}^{-1}$  in the potential range of 0-2 V vs. Li/Li<sup>+</sup> at 100<sup>th</sup> cycles. (b) Coulombic efficiencies vs. cycle number of the samples measured at a current density of  $100 \text{ mA g}^{-1}$  in the potential range of 0-2 V vs. Li/Li<sup>+</sup> for 100 cycles.

**Table S2.** ICP analysis of comm. Ge, Ge/TiO<sub>2</sub>-3, Ge/TiO<sub>2</sub>-4, and Ge/TiO<sub>2</sub>-6

| <b>Wt. %</b> | <b>comm.Ge</b> | <b>Ge@TiO<sub>2</sub>-3</b> | <b>Ge@TiO<sub>2</sub>-4</b> | <b>Ge@TiO<sub>2</sub>-6</b> |
|--------------|----------------|-----------------------------|-----------------------------|-----------------------------|
| <b>Ge</b>    | <b>100</b>     | <b>77</b>                   | <b>63</b>                   | <b>57</b>                   |
| <b>Ti</b>    | <b>0</b>       | <b>23</b>                   | <b>37</b>                   | <b>43</b>                   |
